# Supplementary material for: A one-pot approach for conversion of fructose to 2,5-diformylfuran by combination of Fe3O4-SBA-SO3H and K-OMS-2
Source: Royal Society of Chemistry journal article supplement (doi:10.1039/c2gc35947b), 2012-01-01
Supplement: c2gc35947b.pdf [file c2gc35947b.pdf]

**A one-pot Approach for conversion of Fructose to  
2,5-diformylfuran by combination of Fe<sub>3</sub>O<sub>4</sub>-SBA-SO<sub>3</sub>H and  
K-OMS-2**

*Anhui Province Key Laboratory of Biomass Clean Energy, Department of  
Chemistry, University of Science and Technology of China, Hefei 230026, PR*

*China, Tel: (+86) 551-360-7476, Fax: (+86) 551-360-6689*

**Corresponding author: Yao Fu**  
**e-mail: [fuyao@ustc.edu.cn](mailto:fuyao@ustc.edu.cn)**

## Supplemental Materials

### 1. Materials

The formation of 2,5-DFF from fructose was carried out in a glass tube equipped with a magnetic stirrer, molecular oxygen was simply introduced by an airway. Gas chromatography measurements were conducted on Agilent GC 4890D with a flame ionization detector. RTX-5 capillary column was used for separation. HPLC measurements were conducted on Water 2414 with a Refractive Index detector for fructose conversion detection.

Fructose, Potassium permanganate, manganese sulfate hydrate, Tetraethoxysilane, HCl, H<sub>2</sub>O<sub>2</sub> (30 wt%), DMSO, HNO<sub>3</sub>, H<sub>2</sub>SO<sub>4</sub> were purchased from Sinopharm Chemical Reagent Co., Ltd. Pluronic 123, Fe<sub>3</sub>O<sub>4</sub> NMPs, Naphthalenen, 3-mercaptopropyltrimethoxysilane were purchased from Aladdin Reagent Co., Ltd. 5-HMF and 2,5-DFF were purchased from TCI development Co., Ltd.

### 2. Catalysts preparation

Fe<sub>3</sub>O<sub>4</sub>-SBA-SO<sub>3</sub>H was prepared referring to our previous work. 2 g Fe<sub>3</sub>O<sub>4</sub> NMPs and 4 g Pluronic 123 were added to a round bottom flask which contained 200 mL 0.5 M HCl. After stirring for 2 h, 6.8 g tetraethoxysilane was added and the mixture was heat at 40 °C with stirring. 1.6 g 3-mercaptopropyltrimethoxysilane and 15 mL H<sub>2</sub>O<sub>2</sub> (30 wt%) were added after 3h and the resulting mixture was stirred for 20 h at 40 °C. Then the obtained mixture was transferred to a Teflon-lined autoclave, the catalyst precursor was aged at 100 °C for 24 h. After filtration, 300 mL ethanol was employed to extract the block copolymer P123 in a Soxhlet extractor. Finally, the extracted material was washed with 1 M H<sub>2</sub>SO<sub>4</sub> and a mixture of water and ethanol for several times and dried at 80 °C under vacuum. The amount of S in the catalyst was 4% (m/m), which was detected by ICP atomic emission spectrometry.

H-K-OMS-2 and K-OMS-2 were prepared referring to standard literature procedures. Potassium permanganate solution (225 mL, 0.4 M) was added to a mixture of manganese

sulfate hydrate solution (67.5 mL 1.75 M) and concentrated nitric acid (6.8 mL), then the formed dark brown slurry was heated under reflux at 110 °C. 24h later, K-OMS-2 was obtained after filtered and washed with deionized water. The catalyst was dried at 110 °C for several hours before use. H-K-OMS-2 was synthesized by adding a subsequent process to the synthesis of K-OMS-2. That is, K-OMS-2 was stirred in a 1 M solution of nitric acid for several hours at 60-70 °C. The compositions of K-OMS-2 and H-K-OMS-2 were obtained by elemental analysis as  $\text{KMn}_8\text{O}_{16}\cdot n\text{H}_2\text{O}$  and  $\text{H}_{0.2}\text{K}_{0.8}\text{Mn}_8\text{O}_{16}\cdot n\text{H}_2\text{O}$ , X-ray diffraction (XRD) and infrared (IR) studies were performed.

### 3. Reaction tests

The typical process for aerobic oxidation of 5-HMF to 2,5-DFF: 5-HMF (0.126 g, 1 mmol), K-OMS-2/H-K-OMS-2 (0.05-0.1 g) were charged into a tube, and 3 mL DMSO was added. The tube was heated at 110 °C for 6 h under 10 mL/min  $\text{O}_2$ . Then, the catalyst was filtered and the filtrate was detected by GC analysis with naphthalene as internal standard (Fig S10, ESI†).

The typical process for one-pot synthesis of 2,5-DFF: Fructose (0.18 g, 1 mmol) and  $\text{Fe}_3\text{O}_4$ -SBA- $\text{SO}_3\text{H}$  (0.1 g) were added to 3 mL DMSO, the mixture was heated at 110 °C for 2 h. Then K-OMS-2 (0.1 g) was added without catalyst separation, the mixture was heated at 110 °C for another 6 h under molecular oxygen flow (10 mL/min). Fructose conversion and 5-HMF yield was detected by HPLC analysis, 2,5-DFF yield was detected by GC analysis.

Separation of 2,5-DFF from DMSO: After catalyst(s) was filtered and washed with DMSO for several times, 30 mL  $\text{H}_2\text{O}$  was added to the solution. Then, ethyl acetate ( $3\times 10$  mL) was added for extracting 2,5-DFF from the solution. After combining the ethyl acetate layer, 5% NaCl aqueous ( $3\times 10$  mL) was added for removal of the residual DMSO by extracting. Finally, the rest solution was dried with anhydrous  $\text{MgSO}_4$ , 2,5-DFF was obtained after condensing the solution. The  $^1\text{H}$  NMR and  $^{13}\text{C}$  NMR spectra were shown as Fig. S11, S12.

## 4. Results

**Table S1.** Texture properties of K-OMS-2 and MnO<sub>2</sub>

| Sample           | S <sub>BET</sub> (m <sup>2</sup> /g) | Pore Vol (cm <sup>3</sup> /g) |
|------------------|--------------------------------------|-------------------------------|
| K-OMS-2          | 77.2106                              | 0.451680                      |
| MnO <sub>2</sub> | 0.1324                               | 0.000502                      |

**Table S2.** Scale-up condition for aerobic oxidation of 5-HMF to 2,5-DFF<sup>a</sup>.

| Entry | Substrate | Catalyst | Oxidant        | Solvent | Yield(%) |
|-------|-----------|----------|----------------|---------|----------|
| 1     | 5-HMF     | K-OMS-2  | O <sub>2</sub> | DMSO    | 70       |
| 2     | 5-HMF     | K-OMS-2  | air            | DMSO    | 20       |

<sup>a</sup> 2g 5-HMF, 2g K-OMS-2, 15mL solvents, 10mL/min air/O<sub>2</sub>. React at 110°C for 6h. Selectivity of 2,5-DFF was 100%.

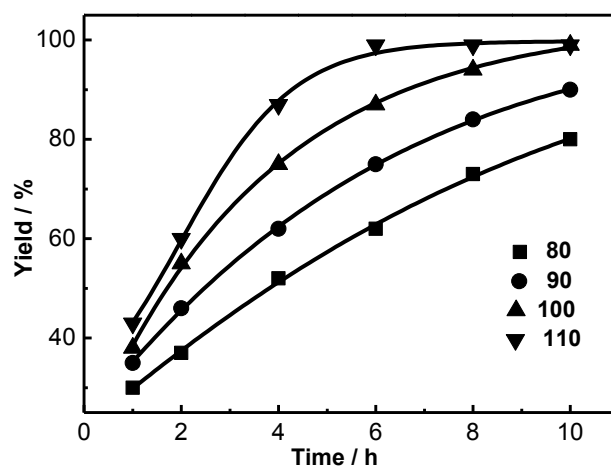

**Fig. S1** Yields of 5-HMF under different temperature and different time. Reaction conditions: 1 mmol 5-HMF, 0.1 g K-OMS-2, 3 mL DMSO, 10 mL/min O<sub>2</sub>.

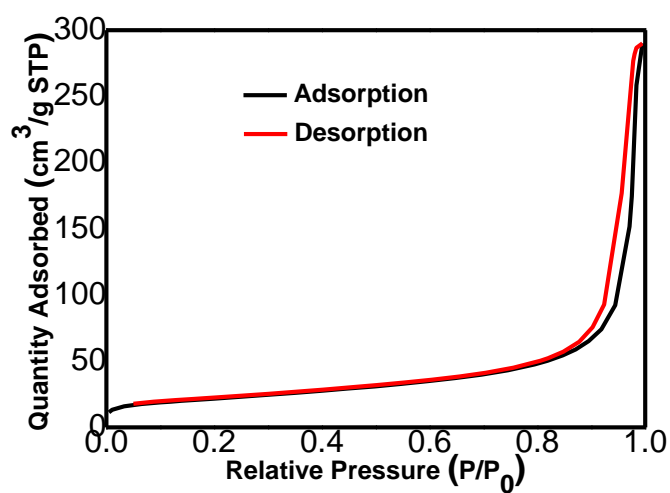

**Figure S2** N<sub>2</sub> adsorption–desorption isotherm of K-OMS-2.

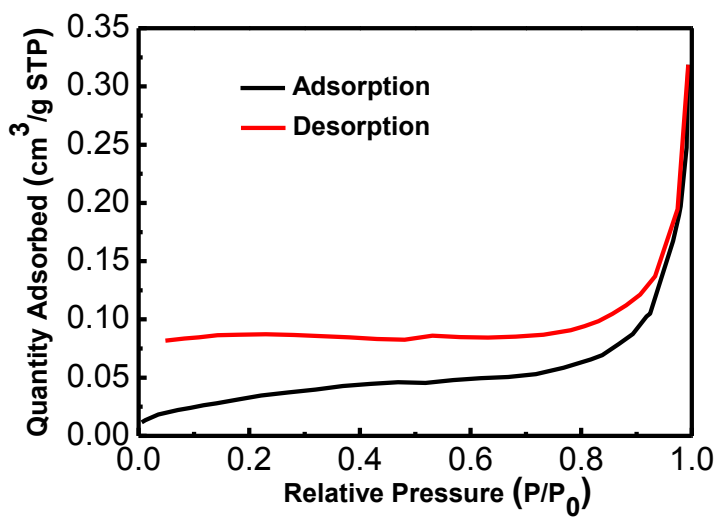

**Figure S3** N<sub>2</sub> adsorption–desorption isotherm of MnO<sub>2</sub>.

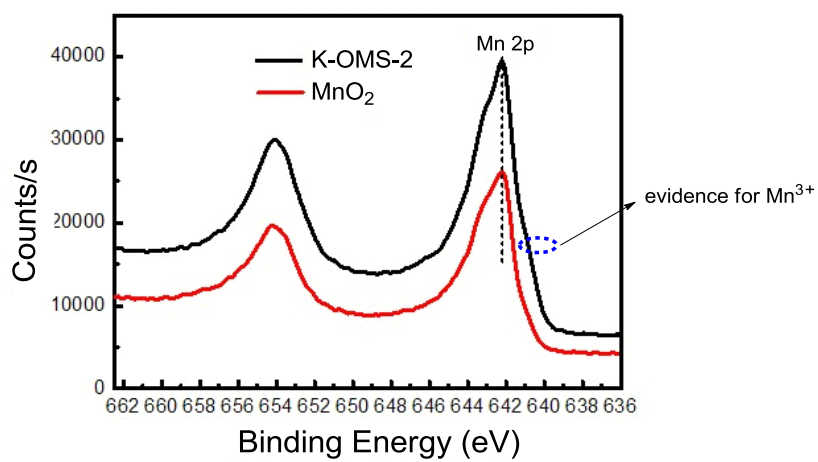

**Figure S4** XPS patterns for K-OMS-2 and MnO<sub>2</sub>.

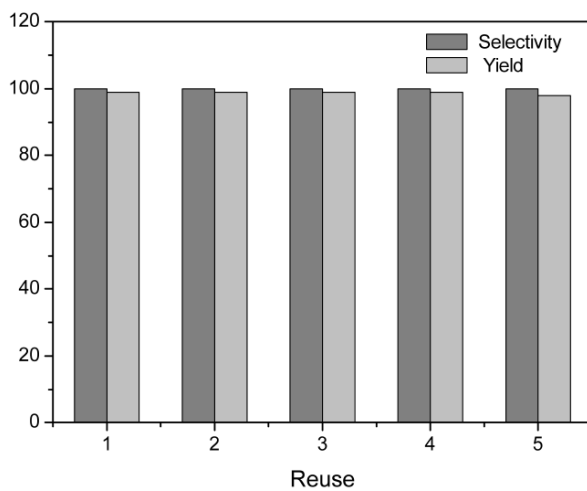

**Fig. S5** Reuse of K-OMS-2 for oxidation of 5-HMF towards 2,5-DFF.

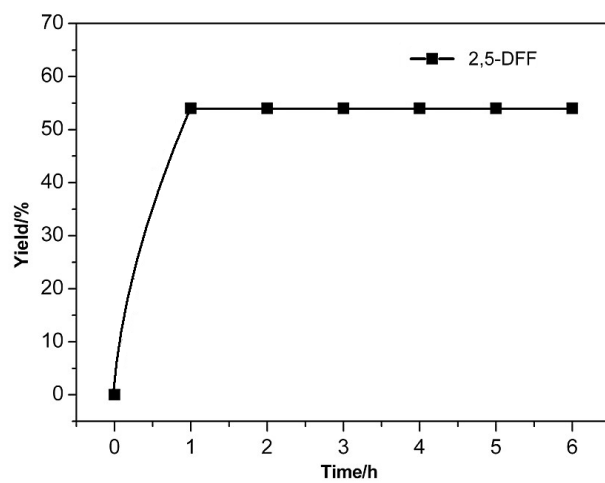

**Fig. S6** Time course of product distribution after filtration of K-OMS-2 catalyst.

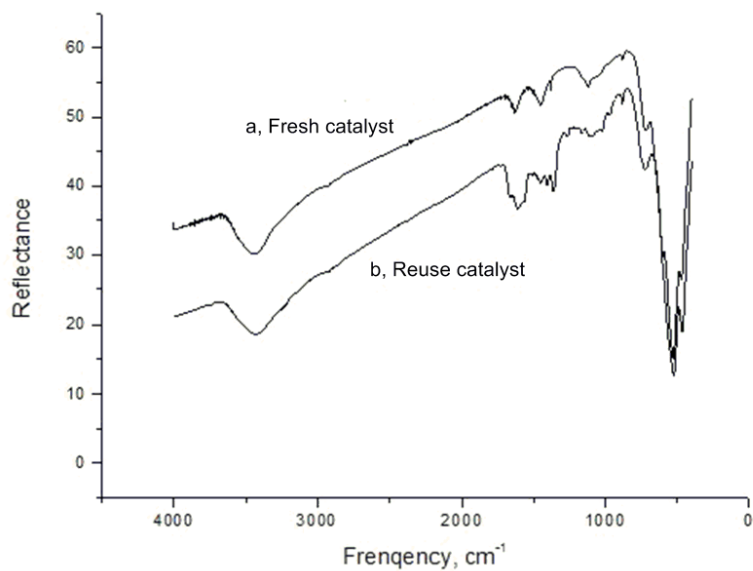

**Figure S7** IR spectra for fresh (a) and reuse (b) K-OMS-2 catalyst.

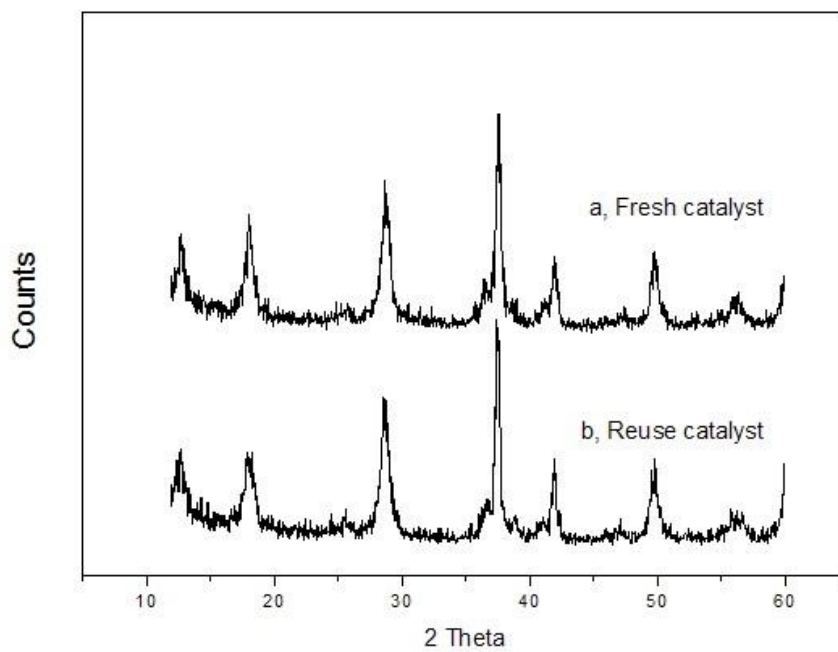

**Figure S8** XRD patterns for fresh (a) and reuse (b) K-OMS-2 catalyst.

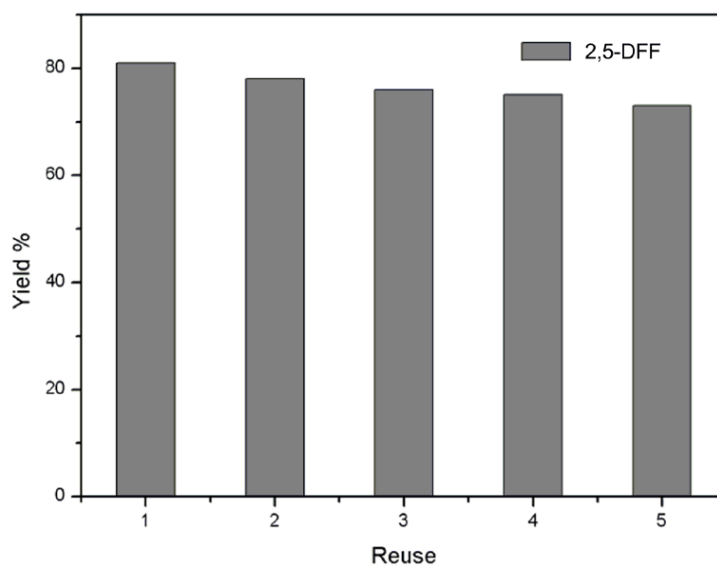

**Fig. S9** Reuse of  $\text{Fe}_3\text{O}_4\text{-SBA-SO}_3\text{H}$  and K-OMS-2 for conversion of fructose to 2,5-DFF in one-pot reaction.



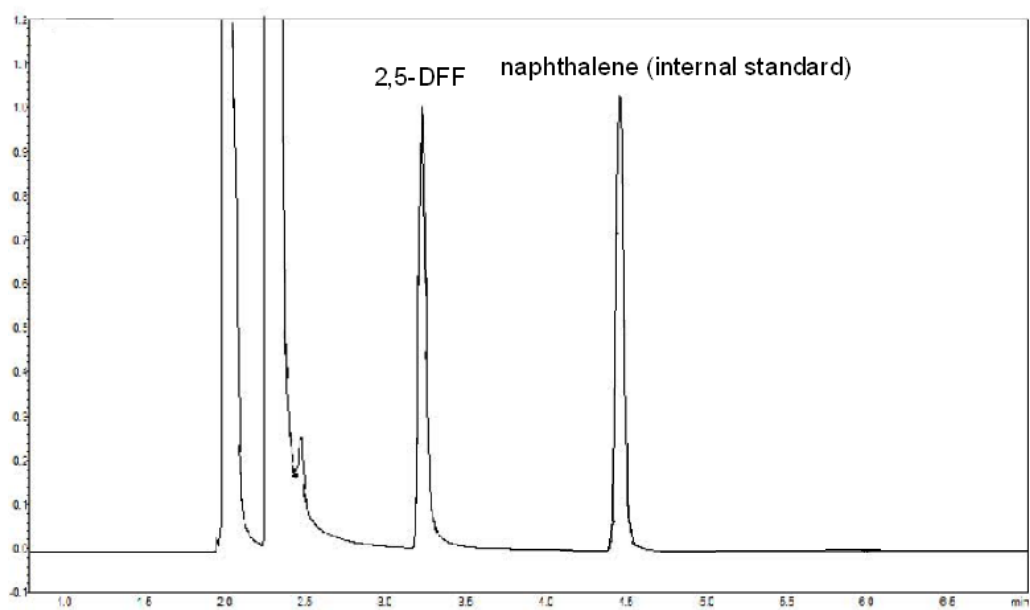

**Figure S10** GC trace for one-pot synthesis of 2,5-DFF.

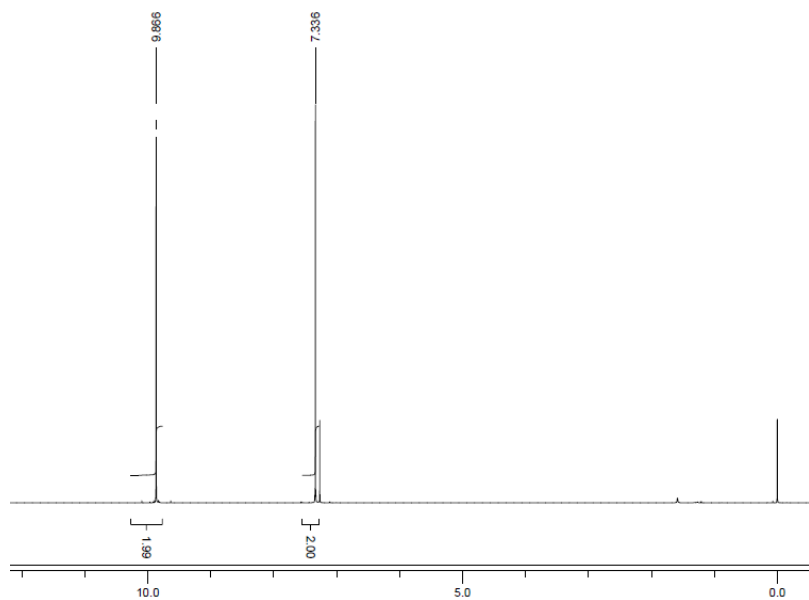

**Figure S11** <sup>1</sup>H NMR (CDCl<sub>3</sub>) of 2,5-DFF after separate from DMSO.

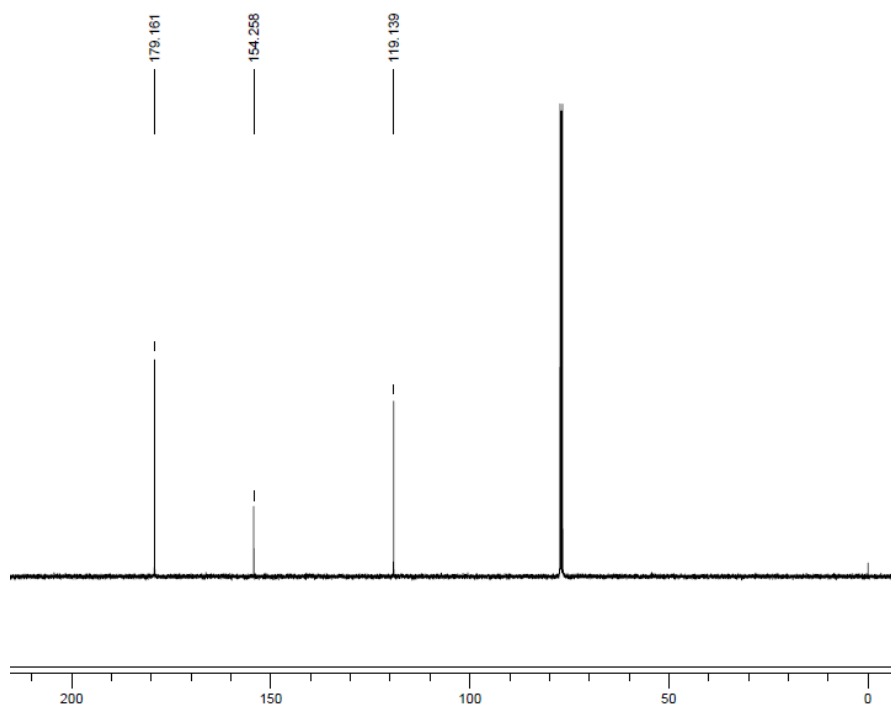

**Figure S12**  $^{13}\text{C}$  NMR ( $\text{CDCl}_3$ ) of 2,5-DFF after separate from DMSO.
